# Supplementary material
Source: publisher site journal article supplement (https://www.spandidos-publications.com/6475/downloadSupplementary)
Supplement: Supplementary file 1 [file downloadSupplementary]

## Sheet: Table SI
Table SI. Differential metabolites between the TGF-β1 and control groups.
A, Negative ion mode
MS2.name	MS2.ppm	MS2.score	Monoisotopic.Molecular.Weight	RT.[min]	Formula	Molecular.Weight	m/z	MEAN Control	MEAN TGF-β1	VIP	P-VALUE	Q-VALUE	FOLD CHANGE	Control_1	Control_2	Control_3	TGF-β1_1	TGF-β1_2	TGF-β1_2
Suberic acid	-16.8	70.3	174.089	4.226	C8 H14 O4	174.086	173.079	0.000162248	0.000195289	1.43475	0.00186487	0.011235	1.20364	0.000169848	0.000158867	0.000158028	0.000194218	0.000199943	0.000191705
Tyrosine	-16.84	82.8	181.074	1.055	C9 H11 N O3	181.071	180.064	0.000961686	0.00120095	1.25287	0.0316746	0.0552286	1.2488	0.000932357	0.00108863	0.000864072	0.00114118	0.00125156	0.00121012
5-Hydroxyindoleacetic acid	1.81	18.7	191.058	3.069	C10 H9 N O3	191.059	190.051	0.0004139	0.000855392	1.4615	0.000842117	0.00785793	2.06666	0.000424527	0.000373561	0.000443612	0.000771868	0.000922996	0.000871311
Citric acid	-16.37	85.9	192.027	0.758	C6 H8 O7	192.024	191.017	0.00177306	0.00215566	1.38425	0.00570745	0.0198211	1.21579	0.0016514	0.00178655	0.00188122	0.00220255	0.00212258	0.00214184
BIOTIN	-12.76	66.4	244.088	3.704	C10 H16 N2 O3 S	244.085	243.078	0.000178351	0.000231142	1.46943	0.000383493	0.00548047	1.296	0.000173073	0.000181914	0.000180066	0.000227066	0.00022731	0.000239051
Palmitic Acid	-13.04	89.8	256.24	9.662	C16 H32 O2	256.237	255.23	0.000609958	0.000825115	1.44448	0.00116226	0.0091007	1.35274	0.000570514	0.000621712	0.00063765	0.000840968	0.000792538	0.000841839
gamma-Glutamylleucine	-12.05	46.6	260.137	2.543	C11 H20 N2 O5	260.134	259.127	3.16033e-05	7.84543e-05	1.47671	0.000448013	0.00582619	2.48248	2.93703e-05	3.27759e-05	3.26637e-05	7.43031e-05	8.70044e-05	7.40555e-05
16-Hydroxyhexadecanoic acid	-11.97	68.1	272.235	11.964	C16 H32 O3	272.232	271.225	0.000175332	0.000214015	1.28729	0.0301369	0.0535627	1.22063	0.000171801	0.000185217	0.000168976	0.000230184	0.000217873	0.000193986
FA 18:4	-11.6	75.4	276.209	11.215	C18 H28 O2	276.206	275.198	3.16018e-05	7.05802e-05	1.44825	0.0016129	0.0105045	2.23342	2.95359e-05	2.86429e-05	3.66266e-05	6.39162e-05	6.87557e-05	7.90687e-05
Guanosine	-12.44	73.8	283.092	1.084	C10 H13 N5 O5	283.088	282.081	0.000670078	0.000288005	1.44352	0.00242684	0.0125263	0.429808	0.000674773	0.000757429	0.000578034	0.000314499	0.000303885	0.000245631
13-HODE	-12.18	81.8	296.235	9.763	C18 H32 O3	296.232	295.224	0.000173353	0.000259588	1.23907	0.0323203	0.0559476	1.49746	0.000197361	0.000137115	0.000185583	0.000278722	0.000279336	0.000220708
N-Acetylaspartylglutamic acid	-12.24	53	304.091	1.07	C11 H16 N2 O8	304.087	303.08	0.00108994	0.000911169	1.43568	0.00162596	0.0105453	0.835977	0.00110442	0.00107929	0.00108613	0.000883889	0.000894105	0.000955512
Arachidic acid	-12.87	33.9	312.303	11.117	C20 H40 O2	312.299	311.292	3.18414e-06	8.59358e-07	1.2871	0.00219917	0.0120505	0.269887	3.37672e-06	3.06661e-06	3.10909e-06	8.23952e-07	3.27284e-07	1.42684e-06
11,12-Epoxyeicosatrienoic acid	-12.03	84.4	320.235	9.898	C20 H32 O3	320.231	319.224	7.53313e-05	0.000109628	1.35705	0.00843053	0.0255491	1.45528	7.13691e-05	8.78538e-05	6.6771e-05	0.000104304	0.000109683	0.000114897
11-HETE	-11.87	77.7	320.235	10.177	C20 H32 O3	320.231	319.224	5.74309e-05	0.000112545	1.37895	0.0101556	0.0286724	1.95966	4.77994e-05	6.89315e-05	5.55618e-05	0.000108044	0.000132239	9.73513e-05
Adenosine 3',5'-cyclic monophosphate	-9.23	75.7	329.053	0.984	C10 H12 N5 O6 P	329.049	328.042	8.33989e-05	2.64774e-05	1.46167	6.88587e-05	0.00260713	0.317479	8.42524e-05	8.37208e-05	8.22236e-05	3.30194e-05	2.28911e-05	2.35216e-05
Melibiose	-13.07	32	342.116	0.849	C12 H22 O11	342.112	341.105	0.00145913	0.00848619	1.45719	0.0387149	0.062673	5.81592	0.00150738	0.00143091	0.0014391	0.00563734	0.00998194	0.00983929
INOSINE 5'-PHOSPHATE	-11.71	84.8	348.047	0.927	C10 H13 N4 O8 P	348.043	347.036	0.00133661	0.00222991	1.37278	0.013223	0.0336156	1.66833	0.00127349	0.00124459	0.00149177	0.00248256	0.00184516	0.002362
GUANOSINE 5'-MONOPHOSPHATE	-11.61	85	363.058	0.922	C10 H14 N5 O8 P	363.054	362.047	0.00281166	0.00320316	1.26305	0.0303189	0.053741	1.13924	0.00263333	0.00280384	0.0029978	0.00324179	0.00309328	0.00327442
Palmitoylcarnitine	-14.05	77	399.335	9.661	C23 H45 N O4	399.329	398.323	0.00120757	0.00171221	1.43082	0.00258128	0.0128188	1.4179	0.00112046	0.0012303	0.00127195	0.00182636	0.00162168	0.00168859
LysoPE(16:0/0:0)	-11.71	69.8	453.286	10.035	C21 H44 N O7 P	453.28	452.273	0.000138242	0.000161732	1.31726	0.0224625	0.0450982	1.16992	0.000143148	0.000133581	0.000137996	0.000172414	0.000160655	0.000152127
LysoPE(18:2)	-11.94	84.9	477.286	9.494	C23 H44 N O7 P	477.28	476.273	9.21599e-05	6.01398e-05	1.30765	0.0377089	0.0616725	0.65256	8.71567e-05	7.75462e-05	0.000111777	5.79644e-05	6.49055e-05	5.75497e-05
Uridine diphosphate-N-acetylglucosamine	-12.03	87.3	607.082	0.991	C17 H27 N3 O17 P2	607.074	606.067	0.0404918	0.0236932	1.37961	0.0154551	0.0366478	0.585136	0.03406	0.0478398	0.0395758	0.0217821	0.023793	0.0255045
B, Positive ion mode
MS2.name	MS2.ppm	MS2.score	Monoisotopic.Molecular.Weight	RT.[min]	Formula	Molecular.Weight	m/z	MEAN Control	MEAN TGF-β1	VIP	P-VALUE	Q-VALUE	FOLD CHANGE	Control_1	Control_2	Control_3	TGF-β1_1	TGF-β1_2	TGF-β1_3
Betaine	-3.76	94	117.079	0.949	C5 H11 N O2	117.079	118.086	0.000379911	0.000138161	1.10484	0.0258692	0.136504	0.363666	0.000429354	0.000339063	0.000371316	8.70223e-06	0.000202016	0.000203765
Pipecolic acid	-4.74	87.4	129.079	0.714	C6 H11 N O2	129.078	130.086	0.00010047	0.000414663	1.71173	0.0427026	0.168933	4.12722	9.36847e-05	8.81253e-05	0.000119601	0.000548773	0.000376233	0.000318984
N-Acetylalanine	-4.86	57	131.058	1.045	C5 H9 N O3	131.058	132.065	3.77814e-05	0.000170483	1.73713	0.0198217	0.121695	4.51235	3.8249e-05	3.37526e-05	4.13426e-05	0.000137323	0.000169302	0.000204825
Gly-Gly	-5.88	54.6	132.053	1.386	C4 H8 N2 O3	132.053	133.06	3.79938e-06	1.22598e-05	1.5458	0.0197766	0.121567	3.22678	4.47323e-06	5.23871e-06	1.6862e-06	1.00791e-05	1.6201e-05	1.04992e-05
D-ORNITHINE	-2.93	24.9	132.09	0.832	C5 H12 N2 O2	132.089	133.096	1.20998e-05	4.82923e-05	1.69789	0.00122451	0.0272029	3.99116	8.88968e-06	1.15534e-05	1.58564e-05	5.51798e-05	4.15321e-05	4.81651e-05
Adenine	-4.56	91.7	135.054	1.128	C5 H5 N5	135.054	136.061	0.0108617	0.00318156	1.55233	0.00193597	0.0358184	0.292914	0.0107828	0.0116962	0.0101063	0.00134828	0.00362621	0.00457018
Trigonelline	-6.63	35.5	137.048	1.266	C7 H7 N O2	137.047	138.054	0.000360547	0.000152561	1.63747	0.0108336	0.0885123	0.423136	0.000361656	0.000286056	0.000433929	0.000173898	0.000166456	0.000117327
Proline betaine	-5.65	50.1	143.095	0.831	C7 H13 N O2	143.094	144.101	8.92051e-05	3.00307e-05	1.35938	0.00890733	0.080016	0.336648	8.00565e-05	9.12694e-05	9.62893e-05	7.94757e-06	4.64459e-05	3.56985e-05
L-Lysine	-4.32	58.5	146.106	0.705	C6 H14 N2 O2	146.105	147.112	0.000153329	0.000737812	1.74063	0.0337863	0.152139	4.81194	0.00015541	0.000139815	0.000164763	0.000952344	0.000680463	0.00058063
Cinnamic acid	-4.07	42.4	148.052	3.078	C9 H8 O2	148.052	149.059	3.85596e-05	8.03904e-05	1.55337	0.017736	0.115398	2.08483	4.08819e-05	4.85825e-05	2.62145e-05	7.29782e-05	7.0788e-05	9.7405e-05
Guanine	-6.06	99.6	151.049	1.131	C5 H5 N5 O	151.048	152.056	0.00234467	0.0010558	1.63756	0.00312753	0.0459305	0.450298	0.00260001	0.00230187	0.00213214	0.000779529	0.00129266	0.00109521
Oxypurinol	-4.77	45.7	152.033	1.131	C5 H4 N4 O2	152.033	153.04	0.00030083	0.000104175	1.69684	0.0016129	0.0321025	0.346292	0.00034487	0.000274866	0.000282753	8.11132e-05	0.000127648	0.000103764
4,6-DIOXOHEPTANOIC ACID	-6.08	17.6	158.058	1.347	C7 H10 O4	158.057	159.064	9.24844e-06	4.57471e-06	1.5122	0.0105193	0.0871013	0.494647	8.93148e-06	8.60109e-06	1.02127e-05	2.76752e-06	5.38302e-06	5.57359e-06
4-Pyridoxic acid	-5.68	15	183.053	1.12	C8 H9 N O4	183.052	184.059	1.82237e-05	1.21979e-05	1.62097	0.0110692	0.0896248	0.669339	1.95498e-05	1.87126e-05	1.64088e-05	1.13262e-05	1.11387e-05	1.41286e-05
N3,N4-Dimethyl-L-arginine	-2.31	33.5	202.143	0.76	C8 H18 N4 O2	202.143	203.149	7.53055e-06	1.93971e-05	1.73682	0.000502783	0.0195051	2.57579	6.75527e-06	7.1441e-06	8.6923e-06	2.08461e-05	1.98404e-05	1.75048e-05
Acetyl-L-carnitine	-5.22	97.7	203.116	0.978	C9 H17 N O4	203.115	204.122	0.000179719	8.14288e-05	1.45048	0.0225711	0.128987	0.453091	0.000202427	0.000191156	0.000145573	4.3891e-05	8.40174e-05	0.000116378
Hexanoylcarnitine	-5.59	99	259.178	4.436	C13 H25 N O4	259.177	260.184	4.57025e-05	6.87409e-06	1.53073	0.000314775	0.0158062	0.15041	4.1996e-05	4.68961e-05	4.82153e-05	1.37594e-06	9.22532e-06	1.0021e-05
Adenosine	-6.44	98.7	267.097	1.132	C10 H13 N5 O4	267.095	268.102	0.000618219	0.000129636	1.51084	0.00104689	0.0251939	0.209694	0.000628799	0.000667906	0.000557951	3.45291e-05	0.000178978	0.000175402
Inosine	-6.46	80	268.081	1.164	C10 H12 N4 O5	268.079	269.086	0.00028287	0.00059753	1.59645	0.0320187	0.14888	2.11239	0.000325744	0.000238053	0.000284813	0.000760856	0.000596887	0.000434848
Decanoylcarnitine	-6.35	94.6	315.241	6.912	C17 H33 N O4	315.239	316.246	1.57307e-05	5.63923e-06	1.33138	0.0391468	0.161992	0.358484	1.53753e-05	1.54727e-05	1.63442e-05	1.42358e-06	7.2828e-06	8.2113e-06
2-methoxy-4-pentadecylbenzoic acid	-8.29	42.4	362.282	9.781	C23 H38 O3	362.279	363.286	1.89162e-05	5.52741e-06	1.57984	0.00528564	0.0602806	0.292204	2.09959e-05	2.07794e-05	1.49734e-05	2.88701e-06	7.74172e-06	5.95351e-06
MG(0:0/20:4(5Z,8Z,11Z,14Z)/0:0)	-12.54	84	378.277	12.506	C23 H38 O4	378.272	379.28	4.9518e-05	1.52255e-05	1.55499	0.00616057	0.0653281	0.307474	4.51459e-05	4.40469e-05	5.93611e-05	7.13351e-06	2.13596e-05	1.71833e-05
Cholest-4-en-3-one	-6.46	68.7	384.339	12.334	C27 H44 O	384.337	385.344	2.10643e-05	7.5014e-06	1.29703	0.0257742	0.136304	0.356119	2.63511e-05	1.93943e-05	1.74475e-05	1.83078e-06	1.01915e-05	1.04819e-05
LysoPC(14:0/0:0)	-6.37	68.8	467.301	8.638	C22 H46 N O7 P	467.298	468.306	1.10751e-05	5.01558e-06	1.40609	0.0171541	0.113504	0.452871	1.18059e-05	1.12648e-05	1.01544e-05	2.29648e-06	5.43129e-06	7.31895e-06
LysoPC(18:3)	-11.36	43.2	517.317	9.871	C26 H48 N O7 P	517.311	518.318	0.000134366	6.89625e-05	1.25534	0.0445617	0.172365	0.513243	0.000127631	0.000153802	0.000121665	2.8305e-05	9.14021e-05	8.71803e-05
LysoPC(18:2)	-6.15	82.7	519.332	9.59	C26 H50 N O7 P	519.329	520.336	0.000239421	0.000106925	1.30552	0.0210223	0.125009	0.446597	0.000230385	0.00025457	0.000233308	3.7116e-05	0.000135576	0.000148083
LysoPC(18:1)	-6.4	83.4	521.348	10.182	C26 H52 N O7 P	521.345	522.352	0.000765951	0.000267271	1.40607	0.0255341	0.135794	0.34894	0.000702576	0.000991493	0.000603785	9.88156e-05	0.000354415	0.000348584
LysoPC(22:6)	-6.89	69.7	567.332	9.512	C30 H50 N O7 P	567.329	568.336	0.000128486	5.51278e-05	1.20469	0.0297651	0.144405	0.429056	0.000118051	0.000138817	0.000128591	1.2482e-05	7.87517e-05	7.41497e-05
